# Supplementary material for: α-Particle-induced DNA damage tracks in peripheral blood mononuclear cells of [223Ra]RaCl2-treated prostate cancer patients
Source: PubMed Central journal article supplement (PMC8263441; doi:10.1007/s00259-020-05170-6), 2021-02-04
Supplement: 259_2020_5170_MOESM1_ESM.pdf [file 259_2020_5170_MOESM1_ESM.pdf]

## $\alpha$ -particle-induced DNA damage tracks in peripheral blood mononuclear cells of $[^{223}\text{Ra}]\text{RaCl}_2$ -treated prostate cancer patients – Supplementary Material

S. Schumann<sup>1\*</sup>, U. Eberlein<sup>1\*</sup>, C. Lapa<sup>1,2</sup>, J. Müller<sup>3</sup>, S. Serfling<sup>1</sup>, M. Lassmann<sup>1†</sup>, H. Scherthan<sup>3†</sup>

- 1) Department of Nuclear Medicine, University of Würzburg, Würzburg, Germany
- 2) Nuclear Medicine, Medical Faculty, University of Augsburg, Augsburg, Germany
- 3) Bundeswehr Institute of Radiobiology affiliated to the University of Ulm, Munich, Germany

\* Shared first authorship

† Shared senior authorship

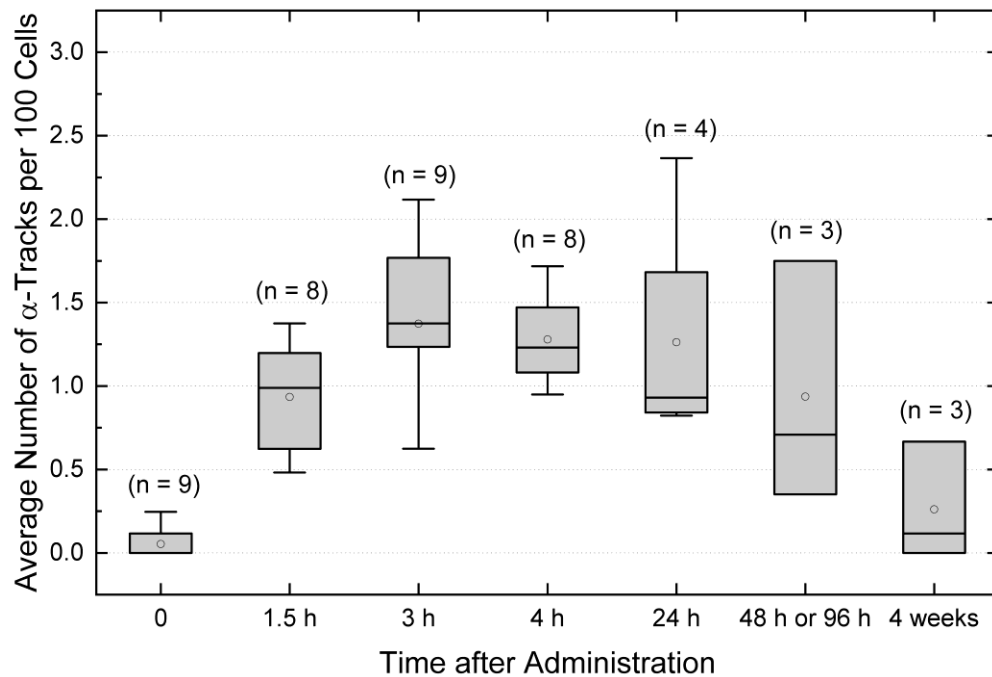

**Suppl. Figure 1:** Boxplot of the average number of  $\alpha$ -tracks per 100 cells at the different blood sampling time points. A significant increase of the average  $\alpha$ -track frequency was observed in the samples taken 1.5 h ( $p=0.008$ ), 3 h ( $p = 0.004$ ) and 4 h ( $p = 0.008$ ) after administration relative to baseline (0) and between 1.5 h and 3 h after administration ( $p = 0.008$ ).

**Suppl. Table 1:** Blood sampling time points, results of the activity measurements, the absorbed dose calculations and the enumeration of  $\alpha$ -tracks.

| Patient | Exact blood sampling time point: time after administration (h) | Activity concentration in the blood (Bq ml <sup>-1</sup> ) | Absorbed dose to the blood up to this time point (mGy) | Average number of $\alpha$ -tracks per 100 cells | SD of the average number of $\alpha$ -tracks per 100 cells |
|---------|----------------------------------------------------------------|------------------------------------------------------------|--------------------------------------------------------|--------------------------------------------------|------------------------------------------------------------|
| P1      | before administration                                          | 0.0                                                        | 0.0                                                    | 0.00                                             | 0.00                                                       |
|         | 1.6                                                            | 87.4                                                       | 3.0                                                    | 0.63                                             | 0.28                                                       |
|         | 3.1                                                            | 44.9                                                       | 4.5                                                    | 0.66                                             | 0.27                                                       |
|         | 4.1                                                            | 40.2                                                       | 5.2                                                    | 1.43                                             | 0.40                                                       |
|         | 29.6                                                           | 8.6                                                        | 10.6                                                   | 2.37                                             | 0.56                                                       |
|         | 46.6                                                           | 6.0                                                        | 12.5                                                   | 1.75                                             | 0.47                                                       |
| P2      | before administration                                          | 0.0                                                        | 0.0                                                    | 0.12                                             | 0.12                                                       |
|         | 1.50                                                           | 46.3                                                       | 1.4                                                    | 0.85                                             | 0.32                                                       |
|         | 3.22                                                           | 32.1                                                       | 2.4                                                    | 1.77                                             | 0.44                                                       |
|         | 4.08                                                           | 24.5                                                       | 2.8                                                    | 1.72                                             | 0.46                                                       |
| P3      | before administration                                          | 0.0                                                        | 0.0                                                    | 0.00                                             | 0.00                                                       |
|         | 1.50                                                           | 38.3                                                       | 1.1                                                    | 1.18                                             | 0.37                                                       |
|         | 3.00                                                           | 24.5                                                       | 1.8                                                    | 1.38                                             | 0.41                                                       |
|         | 4.05                                                           | 21.1                                                       | 2.2                                                    | 1.34                                             | 0.39                                                       |
| P4      | before administration                                          | 0.0                                                        | 0.0                                                    | 0.00                                             | 0.00                                                       |
|         | 1.50                                                           | 20.0                                                       | 0.6                                                    | 0.48                                             | 0.24                                                       |
|         | 3.08                                                           | 12.0                                                       | 1.0                                                    | 2.12                                             | 0.51                                                       |
|         | 4.10                                                           | 11.6                                                       | 1.2                                                    | 0.95                                             | 0.34                                                       |
| P5      | before administration                                          | 0.0                                                        | 0.0                                                    | 0.00                                             | 0.00                                                       |
|         | 1.00                                                           | 45.2                                                       | 0.9                                                    | 0.50                                             | 0.25                                                       |
|         | 2.08                                                           | 25.5                                                       | 1.5                                                    | 0.59                                             | 0.26                                                       |
|         | 3.32                                                           | 18.2                                                       | 1.9                                                    | 1.25                                             | 0.40                                                       |
| P6      | before administration                                          | 0.0                                                        | 0.0                                                    | 0.00                                             | 0.00                                                       |
|         | 1.53                                                           | 33.6                                                       | 0.9                                                    | 1.13                                             | 0.38                                                       |
|         | 2.98                                                           | 21.3                                                       | 1.6                                                    | 1.23                                             | 0.39                                                       |
|         | 4.00                                                           | 19.4                                                       | 1.9                                                    | 1.52                                             | 0.42                                                       |
| P7      | before administration                                          | 0.0                                                        | 0.0                                                    | 0.25                                             | 0.17                                                       |
|         | 1.6                                                            | 41.3                                                       | 1.3                                                    | 1.38                                             | 0.41                                                       |
|         | 3.2                                                            | 25.0                                                       | 2.1                                                    | 1.96                                             | 0.49                                                       |
|         | 4.0                                                            | 20.1                                                       | 2.4                                                    | 1.10                                             | 0.35                                                       |
|         | 23.1                                                           | 4.4                                                        | 4.7                                                    | 0.86                                             | 0.30                                                       |
|         | 47.0                                                           | 1.7                                                        | 5.8                                                    | 0.71                                             | 0.29                                                       |
|         | 671.8                                                          | -*                                                         | 6.4                                                    | 0.67                                             | 0.27                                                       |
| P8      | before administration                                          | 0.0                                                        | 0.0                                                    | 0.00                                             | 0.00                                                       |
|         | 1.5                                                            | 27.7                                                       | 0.8                                                    | 0.62                                             | 0.28                                                       |
|         | 2.9                                                            | 17.4                                                       | 1.3                                                    | 0.63                                             | 0.28                                                       |

|    |                       |      |     |      |      |
|----|-----------------------|------|-----|------|------|
|    | 4.0                   | 12.7 | 1.5 | 1.06 | 0.35 |
|    | 23.0                  | 1.7  | 2.6 | 0.82 | 0.31 |
|    | 95.0                  | 0.4  | 3.6 | 0.35 | 0.20 |
|    | 648.1                 | -*   | 4.0 | 0.00 | 0.00 |
| P9 | before administration | 0.0  | 0.0 | 0.12 | 0.12 |
|    | 1.7                   | 19.9 | 0.5 | 1.22 | 0.39 |
|    | 3.1                   | 14.3 | 0.9 | 1.38 | 0.41 |
|    | 4.2                   | 13.1 | 1.2 | 1.13 | 0.38 |
|    | 24.0                  | 4.2  | 3.8 | 1.00 | 0.35 |
|    | 723.9                 | -*   | -** | 0.12 | 0.12 |

\* Activity values for the time points 4 weeks after administration were not measured.

\*\* The total absorbed dose to the blood was not calculated due to the missing data at the time point 48 h or 96 h after administration.
